# Supplementary material for: A novel natural variation in the promoter of GmCHX1 regulates conditional gene expression to improve salt tolerance in soybean
Source: PubMed Central journal article supplement (PMC10837011; doi:10.1093/jxb/erad404), 2023-10-21
Supplement: erad404_suppl_supplementary_figure_s1-s3_tables_s1-s3.pdf [file erad404_suppl_supplementary_figure_s1-s3_tables_s1-s3.pdf]

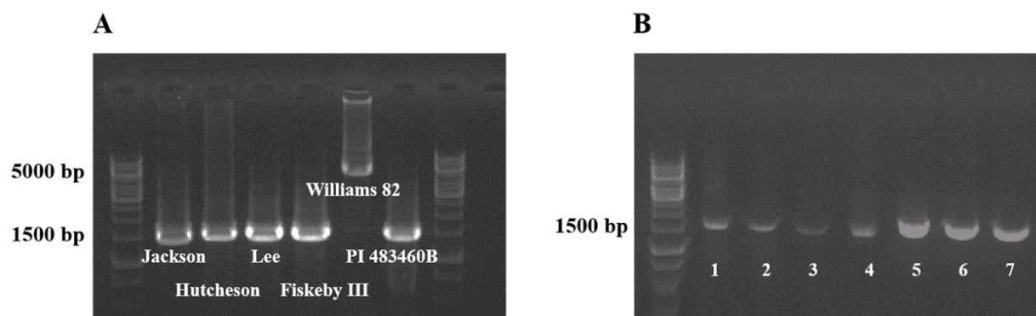

**Supplementary Figure S1 The genotype of 3.78-kb insertion in the third exon of *GmCHX1*.**

(A) Detection of 3.78-kb insertion in *GmCHX1* among the checks and parental lines Williams 82 and PI 483460B. (B) Detection of 3.78-kb insertion in *GmCHX1* among the seven novel salt-tolerant lines. The number of 1-7 represents PI 424116, PI 483460B, PI 468908, PI 080837, PI 378702, PI 407083, and PI 417500, respectively.

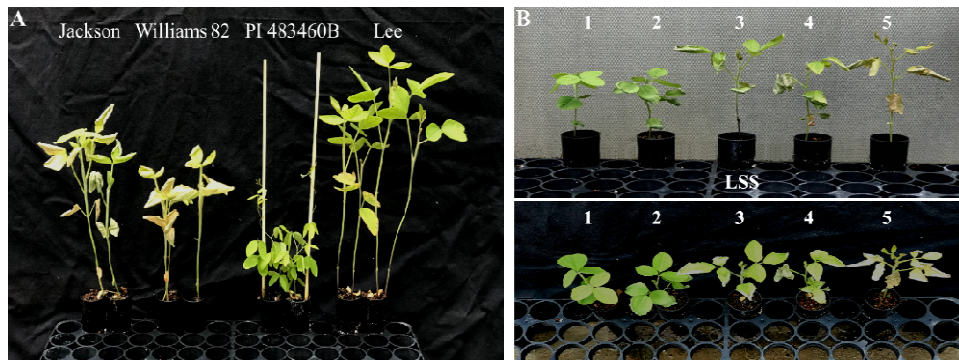

**Supplementary Figure S2 Phenotype of leaf scorch and leaf scorch ranking in soybean lines under salt stress.** (A) Leaf scorch in soybean plants of Jackson (sensitive check), Williams 82, PI 483460B, and Lee (tolerant check) after 100 mM NaCl treatment for three weeks. (B) Leaf scorch ranking from 1 to 5 in the RIL population, where 1 = no apparent chlorosis; 2 = slight (25% of the leaves showed chlorosis); 3 = moderate (50% of the leaves showed chlorosis and some necrosis); 4 = severe chlorosis (75% of the leaves showed chlorosis and severe necrosis); and 5 = dead (leaves showed severe necrosis and were withered).

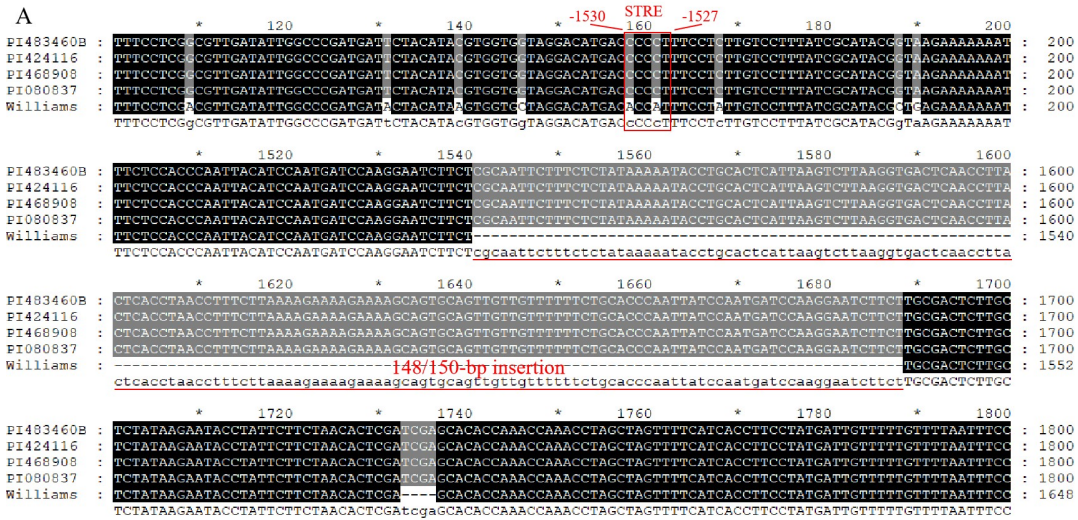

**Supplementary Figure S3** The sequence alignment and variation detection in *GmCXHI* promoter for the three new salt-tolerant soybean lines. (A) The two major sequence variations in *GmCXHI* promoter were detected in three new salt-tolerant soybean lines (PI 424116, PI 468908, PI 080837). Parental lines of PI 483460B and Williams 82 act as checks. STR (CCCCT) motif, responds to salt stress. (B) The sequence polymorphism in *GmCHX1* promoter among the parental lines and three new salt-tolerant lines.

**Supplementary Table S1 The primer pairs were used in this study**

| <b>Primer Name</b> | <b>Sequence</b>                                  | <b>Purpose</b>                         |
|--------------------|--------------------------------------------------|----------------------------------------|
| Pro-insertion-F    | GGGTGTGCCTAAATAGCA                               | Detect the 148/150-bp insertion        |
| Pro-insertion-R    | AAGGAAGAGCGTGGTTCA                               | Detect the 148/150-bp insertion        |
| Exon-insertion-F   | GCGGGAGTAATGTTATCGG                              | Detect the 3.78-kb insertion           |
| Exon-insertion-R   | AAGGTGGTGAAGAGAGCCA                              | Detect the 3.78-kb insertion           |
| qPCR-GmCHX1-F      | ACCTGGCAACATACCCTCA                              | Detect the expression of <i>GmCHX1</i> |
| qPCR-GmCHX1-R      | TGGTCCACTCTTCATTCCG                              | Detect the expression of <i>GmCHX1</i> |
| GmUKN1-F           | TGGTGCTGCCGCTATTTACTG                            | House-keeping gene for qPCR            |
| GmUKN1-R           | GGTGAAGGAAGGCTAACAATC                            | House-keeping gene for qPCR            |
| Pro-Luc-F          | ctatagggcgaattgggtaccGAACAAGTGGG<br>TTAAGGCGTAAA | Dual-Luciferase reporter assay         |
| Pro-Luc-R          | atcgataccgctgacctcgagGGCCAAAGACT<br>CAGTGCTTGTT  | Dual-Luciferase reporter assay         |
| Pro-mut-GUS-F      | TGCTAGGACATGACCCCCTTTC                           | Promoter- <i>GUS</i> in hairy root     |
| Pro-mut-GUS-R      | GAAAGGGGGTCATGTCCTAGCA                           | Promoter- <i>GUS</i> in hairy root     |
| Pro-GUS-F          | tatgaccatgattacgaattcGAACAAGTGGGT<br>TAAGGCGTAAA | Promoter- <i>GUS</i> in hairy root     |
| Pro-GUS-R          | ttaccctcagatctaccatggGGCCAAAGACTC<br>AGTGCTTGTT  | Promoter- <i>GUS</i> in hairy root     |
| qPCR-GUS-F         | CACGCCGTATGTTATTGCCG                             | Detect the expression of GUS gene      |
| qPCR-GUS-R         | CGGTGATATCGTCCACCCAG                             | Detect the expression of GUS gene      |

**Supplementary Table S2 ANOVA were conducted for chlorophyll content and leaf scorch traits in the RIL population**

| Traits               | Source          | DF  | Sum of Squares | Mean Square | F Value | <i>Pr</i> > F |
|----------------------|-----------------|-----|----------------|-------------|---------|---------------|
| CC_CK <sup>a</sup>   | Replication     | 1   | 2483.58        | 2483.58     | 1127.13 | <0.0001       |
|                      | RILs            | 181 | 804.06         | 4.44        | 2.02    | <0.0001       |
|                      | Error           | 176 | 387.81         | 2.20        |         |               |
|                      | Corrected total | 358 | 3741.74        |             |         |               |
| CC_Salt <sup>b</sup> | Replication     | 1   | 1663.52        | 1663.52     | 186.39  | <0.0001       |
|                      | RILs            | 181 | 3642.34        | 20.12       | 2.25    | <0.0001       |
|                      | Error           | 176 | 1570.78        | 8.92        |         |               |
|                      | Corrected total | 358 | 6933.41        |             |         |               |
| CCR <sup>c</sup>     | Replication     | 1   | 0.1            | 0.14        | 10.95   | 0.0011        |
|                      | RILs            | 181 | 4.44           | 0.02        | 1.91    | <0.0001       |
|                      | Error           | 176 | 2.26           | 0.01        |         |               |
|                      | Corrected total | 358 | 6.84           |             |         |               |
| LSS <sup>d</sup>     | Replication     | 1   | 3.73           | 3.73        | 8.14    | 0.0048        |
|                      | RILs            | 181 | 262.45         | 1.45        | 3.16    | <0.0001       |
|                      | Error           | 176 | 80.65          | 0.46        |         |               |
|                      | Corrected total | 358 | 347.27         |             |         |               |

<sup>a</sup>CC\_CK: Chlorophyll content before 100 mM NaCl treatment.

<sup>b</sup>CC\_Salt: Chlorophyll content after 100 mM NaCl treatment.

<sup>c</sup>CCR: Chlorophyll content ratio. CCR = CC\_Salt/CC\_CK.

<sup>d</sup>LSS: Leaf scorch score after 100 mM NaCl treatment.

**Supplementary Table S3 Pearson correlation coefficients among chlorophyll content traits and leaf scorch score (LSS)**

|         | CC_CK              | CC_Salt  | CCR      | LSS  |
|---------|--------------------|----------|----------|------|
| CC_CK   | 1.00               |          |          |      |
| CC_Salt | 0.39***            | 1.00     |          |      |
| CCR     | 0.09 <sup>ns</sup> | 0.95***  | 1.00     |      |
| LSS     | -0.29***           | -0.89*** | -0.86*** | 1.00 |

Pearson correlation coefficients were calculated between different traits with significance levels of  $P < 0.05$  (\*),  $P < 0.01$  (\*\*), and  $P < 0.001$  (\*\*\*). The ns represents no significance. CC\_CK: Chlorophyll content before 100 mM NaCl treatment. CC\_Salt: Chlorophyll content after 100 mM NaCl treatment. CCR: Chlorophyll content ratio.  $CCR = CC\_Salt/CC\_CK$ . LSS: Leaf scorch score after 100 mM NaCl treatment.
